# Supplementary material for: Shining a light on methane dry reforming – exploring the impact of visible light on carbon formation over Co/xCeO2–Al2O3
Source: Royal Society of Chemistry journal article supplement (doi:10.1039/d4cy00925h), 2024-01-01
Supplement: d4cy00925h1.pdf [file d4cy00925h1.pdf]

## Supplementary Information

---

Shining a light on methane dry reforming – exploring the impact of visible light on carbon formation over  $\text{Co}/x\text{CeO}_2\text{-Al}_2\text{O}_3$

---

George E. P. O'Connell<sup>1</sup>, Richard F. Webster<sup>2</sup>, Elise Elkington<sup>1</sup>, Rose Amal<sup>1</sup>, Jason Scott<sup>1\*</sup>, Emma C. Lovell<sup>1\*</sup>

<sup>1</sup> Particles and Catalysis Research Group, School of Chemical Engineering, The University of New South Wales, Sydney, NSW 2052, Australia

<sup>2</sup> Electron Microscopy Unit, The University of New South Wales, Sydney, NSW, 2052, Australia

\* Corresponding authors: [e.lovell@unsw.edu.au](mailto:e.lovell@unsw.edu.au), [jason.scott@unsw.edu.au](mailto:jason.scott@unsw.edu.au)

---

## Table of Contents

|     |                                                                                                   |    |
|-----|---------------------------------------------------------------------------------------------------|----|
| S1  | Experimental Calculations.....                                                                    | 3  |
| S2  | Further Experimental Details.....                                                                 | 5  |
| S3  | Activity Results.....                                                                             | 7  |
| S4  | Thermal Gravimetric Analysis and Raman Spectroscopy.....                                          | 9  |
| S5  | N <sub>2</sub> Physisorption Isotherms.....                                                       | 10 |
| S6  | X-Ray Diffraction – Ceria’s (111) and Alumina’s (440) Phases.....                                 | 11 |
| S7  | Quantitative X-Ray Diffraction (Rietveld Refinement).....                                         | 12 |
| S8  | Raman Spectroscopy.....                                                                           | 13 |
| S9  | Identification of the Al <sub>2</sub> O <sub>3</sub> α <sub>4</sub> H <sub>2</sub> -TPR Peak..... | 14 |
| S10 | X-Ray Diffraction of Co/xCe-Al.....                                                               | 15 |
| S11 | H <sub>2</sub> Temperature-Programmed Reduction.....                                              | 16 |
| S12 | X-Ray Photoelectron Spectroscopy.....                                                             | 17 |
| S13 | Transmission Electron Microscopy – Co Deposit.....                                                | 18 |
| S14 | Transmission Electron Microscopy – Spent Catalysts.....                                           | 21 |
| S15 | <i>In-Situ</i> Diffuse Reflectance Infrared Fourier Transform Spectroscopy.....                   | 22 |
| S16 | References.....                                                                                   | 27 |

## S1 Experimental Calculations

Equation S1 determined the molar ratio between Al and Ce for the flame spray synthesis. The CO<sub>2</sub> conversion, CH<sub>4</sub> conversion, the H<sub>2</sub>/CO generation rates and the H<sub>2</sub>/CO ratio were the metrics employed to assess the performance (Equations S2, S3, S4 and S5, respectively). The light enhancement was calculated on a thermal basis (Equation S6). Equation S7 was used to calculate the CO<sub>2</sub> and CH<sub>4</sub> conversion deactivation extent, which was defined as the activity lost compared to the initial value.

$$x_{Ce/Al}, x = \frac{n_{Al}}{n_{Al} + n_{Ce}} \times 100 \#(S1)$$

$$CO_2 \text{ Conversion}, X_{CO_2} (\%) = \frac{F_{CO_2,in} - F_{CO_2,out}}{F_{CO_2,in}} \times 100\% \#(S2)$$

$$CH_4 \text{ Conversion}, X_{CH_4} (\%) = \frac{F_{CH_4,in} - F_{CH_4,out}}{F_{CH_4,in}} \times 100\% \#(S3)$$

$$x \text{ Produced } (\dot{n}_x, \text{mmol g}_{cat}^{-1} \text{h}^{-1}, x = H_2 \text{ or } CO) = \frac{F_{x,out}}{m_{cat} \times V_m^0}, V_m^0 = 22.4 \text{ mL mmol}^{-1}, \#(S4)$$

$$H_2/CO \text{ Ratio} = \frac{\dot{n}_{H_2}}{\dot{n}_{CO}} \#(S5)$$

$$\text{Light Enhancement of } x, x = CO_2 \text{ or } CH_4 (\%) = \frac{X_{x,VL} - X_{x,Th}}{X_{x,Th}} \times 100\% \#(S6)$$

$$\text{Deactivation Extent of } x, x = CO_2 \text{ or } CH_4 (\%) = \frac{X_{x,initial} - X_{x,final}}{X_{x,initial}} \times 100\% \#(S7)$$

The fractional cobalt loading was determined from ICP-OES (Equation S8). The Scherrer equation (Equation S9) was used to find the crystallite size of Al<sub>2</sub>O<sub>3</sub>, CeO<sub>2</sub> and Co<sub>3</sub>O<sub>4</sub> from XRD.

$$\text{Fractional Co Loading } (\%) = \frac{Co \text{ (wt\%)}}{Co \text{ (wt\%)} + Al \text{ (wt\%)} + Ce \text{ (wt\%)}} \times 100\% \#(S8)$$

$$\tau = \frac{K\lambda}{\beta \cos\theta} \#(S9)$$

The theoretical H<sub>2</sub> consumption was calculated assuming no support was reduced, as the extent of support reduction cannot be accounted for. The actual Co loading determined by ICP-OES was employed for these calculations. A two-step cobalt reduction pathway was assumed, as outlined by Liu et al. (Equations S10 and S11)<sup>1</sup>. With these assumptions, the quantity of hydrogen consumed was calculated via Equation S12.

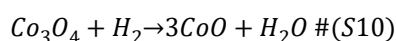

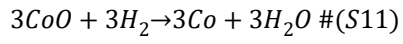

$$n_{H_2} = \left(\frac{4}{3}\right) \times \frac{m_{cat} \times x_{Co}}{M_{r, Co}} \#(S12)$$

The XPS Al/Ce ratio was calculated using Equations S13 – S15, and the amount of Ce<sup>3+</sup> relative to Ce<sup>3+</sup> was calculated using Equation S16.

$$n_{Al} (mol\%) = 100\% \times \frac{a_{Al} \times M_{r, Al}}{\sum(a_i \times M_{r, i})} \#(S13)$$

$$n_{Ce} (mol\%) = 100\% \times \frac{a_{Ce} \times M_{r, Ce}}{\sum(a_i \times M_{r, i})} \#(S14)$$

$$Al/Ce = \frac{n_{Al}}{n_{Ce}} \#(S15)$$

$$Amount\ Ce^{3+} = 100\% \times \frac{Ce^{3+}}{Ce^{3+} + Ce^{4+}} \#(S16)$$

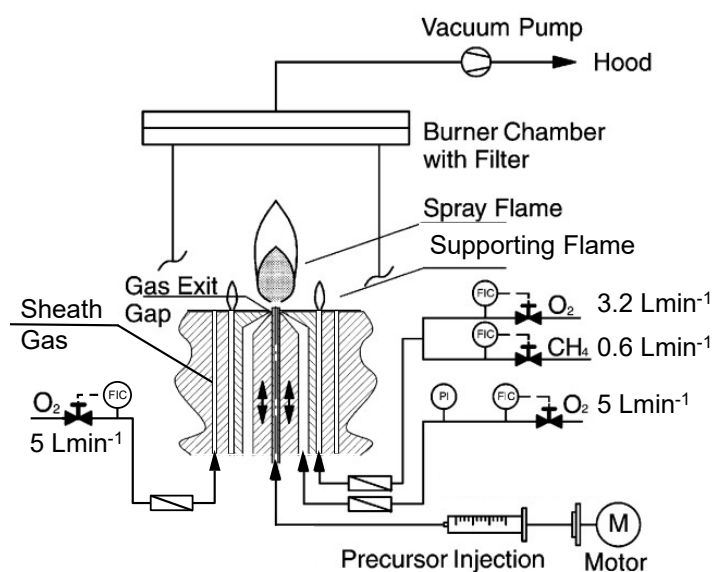

Figure S1: FSP experimental set up. Image adapted from Madler et al. <sup>2</sup> to include sheath line and gas flowrates used in this work.

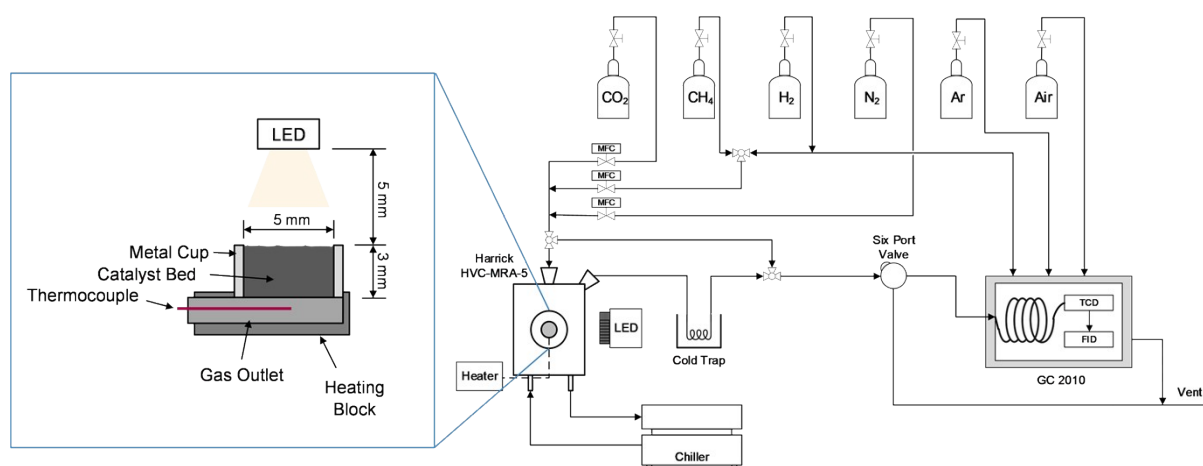

Figure S2: Schematic detailing the in-house reactor setup using a Harrick high-temperature Raman cell and a Shimadzu GC 2010 to measure the effluent gas composition. The blue inset details the sample cup identifying the thermocouple location, and LED mounted 5 mm above a 5 mm diameter aperture for visible light-illumination.

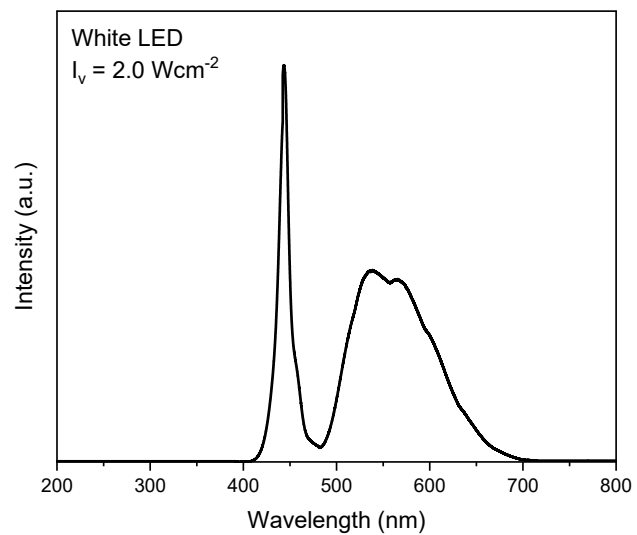

Figure S3: White LED emission spectra. The spectra was obtained from Optical Emission Spectroscopy (OES) using a Princeton Instruments SpectraPro HRS-500 spectrograph with a blaze wavelength of 500 nm and grating of  $1200 \text{ linesmm}^{-1}$ .

### S3 Activity Results

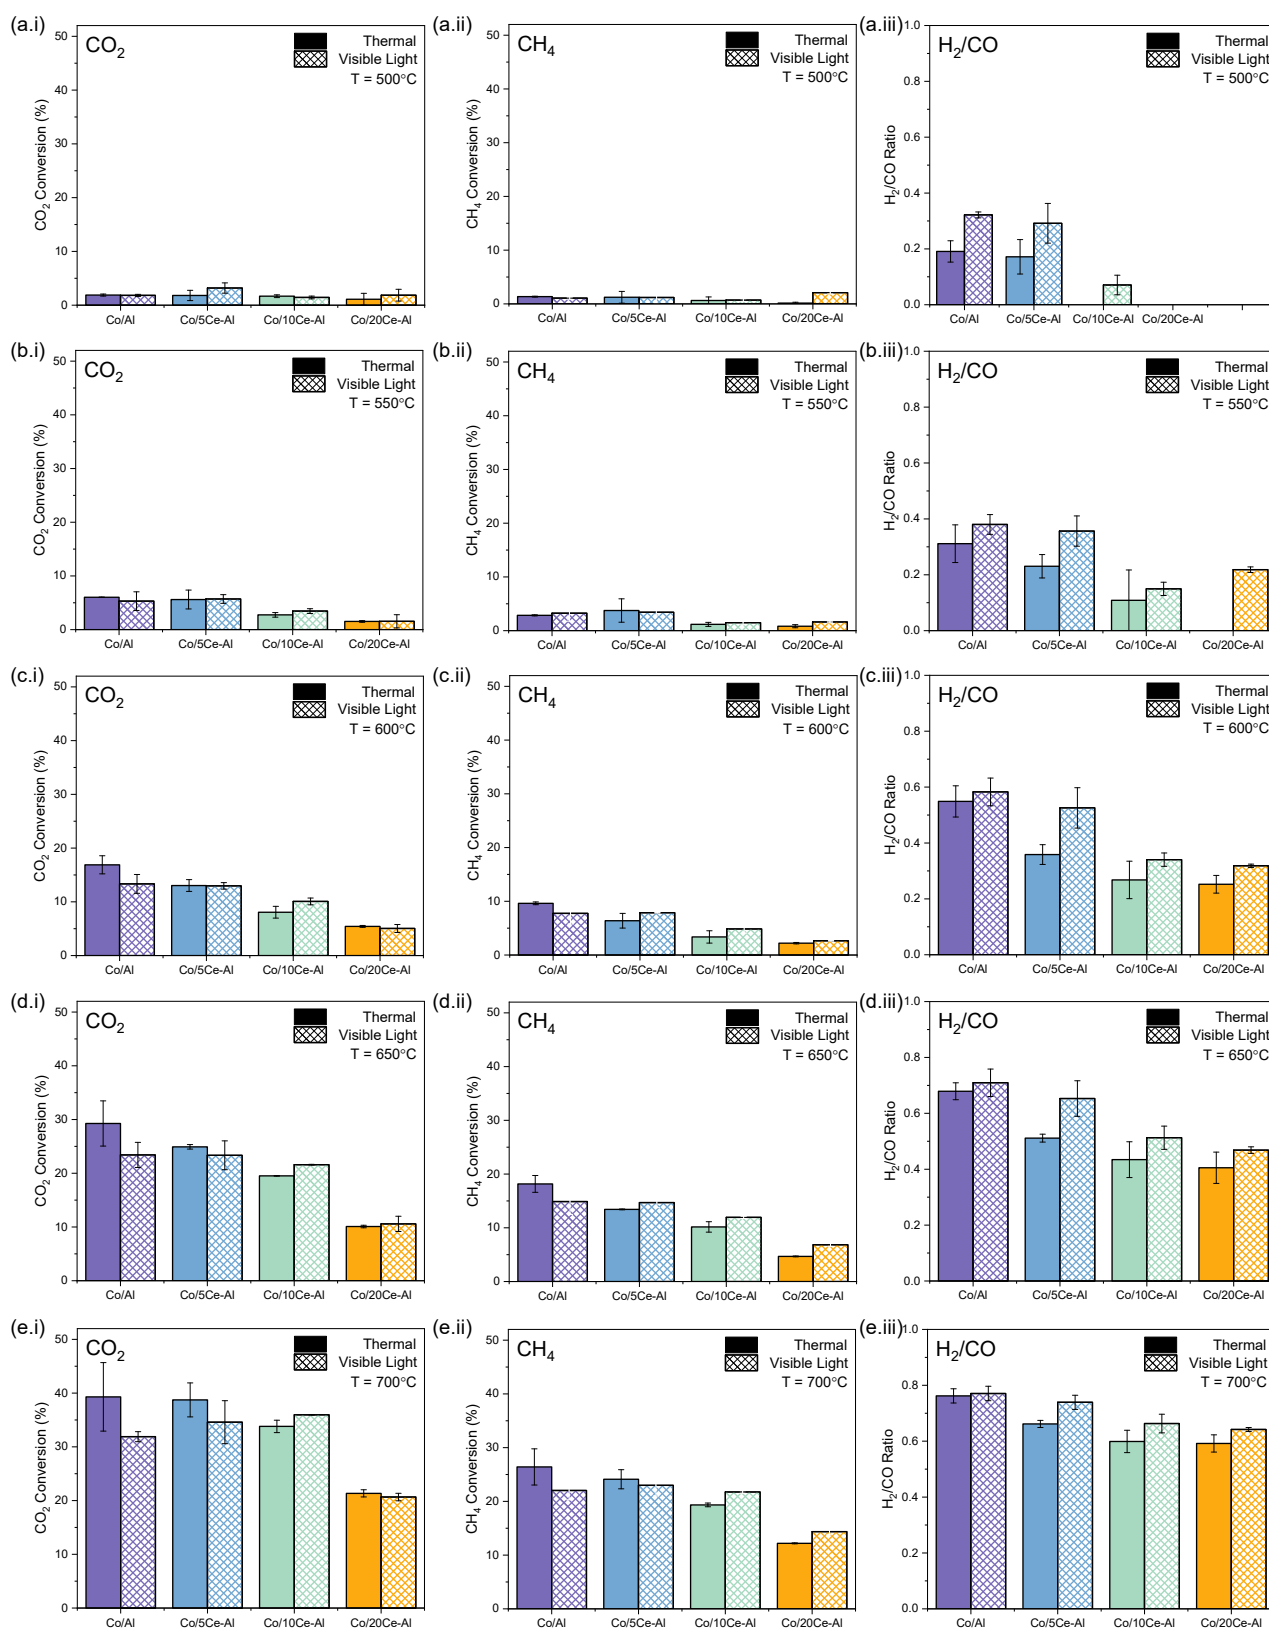

Figure S4: Incremental temperature tests of the Co/xCe-Al catalysts under thermal (■) and visible light-assisted (▨) reaction conditions at (a) 500 °C, (b) 550 °C, (c) 600 °C, (d) 650 °C and (e) 700 °C showing (i) CO<sub>2</sub> conversion, (ii) CH<sub>4</sub> Conversion and (iii) H<sub>2</sub>/CO ratio. Catalysts were reduced and passivated ex-situ at 850 °C for 1 h, then in-situ at 550 °C for 1 h (GHSV = 12 000 h<sup>-1</sup>, CO<sub>2</sub>/CH<sub>4</sub> = 1).

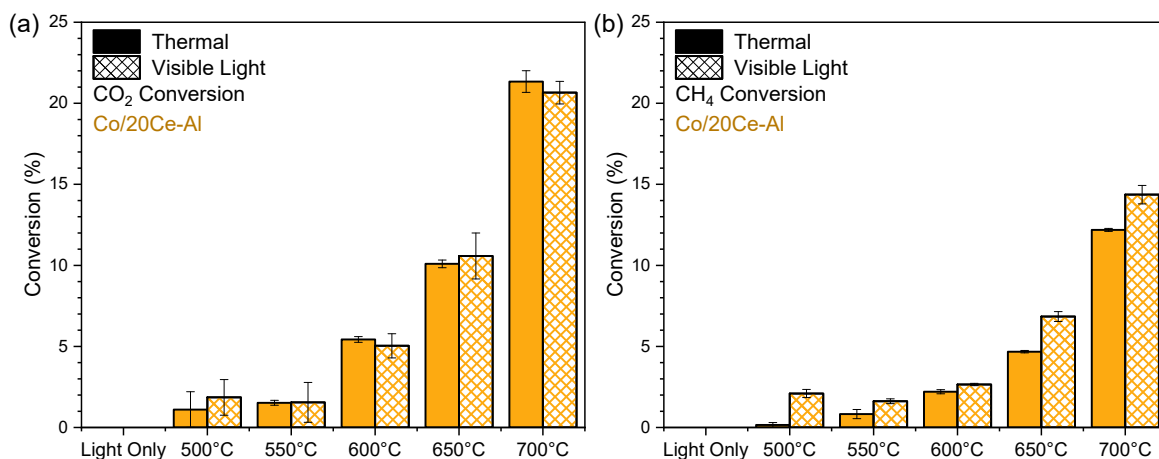

Figure S5: (a) CO<sub>2</sub> conversion and (b) CH<sub>4</sub> conversion of the Co/20Ce-Al catalyst under thermal catalysts under thermal (■) and visible light-assisted (▨) reaction conditions at various temperatures. The “light only” experiment was conducted with no thermal energy input. Catalysts were reduced and passivated ex-situ at 850 °C for 1 h, then in-situ at 550 °C for 1 h (GHSV = 12 000 h<sup>-1</sup>, CO<sub>2</sub>/CH<sub>4</sub> = 1).

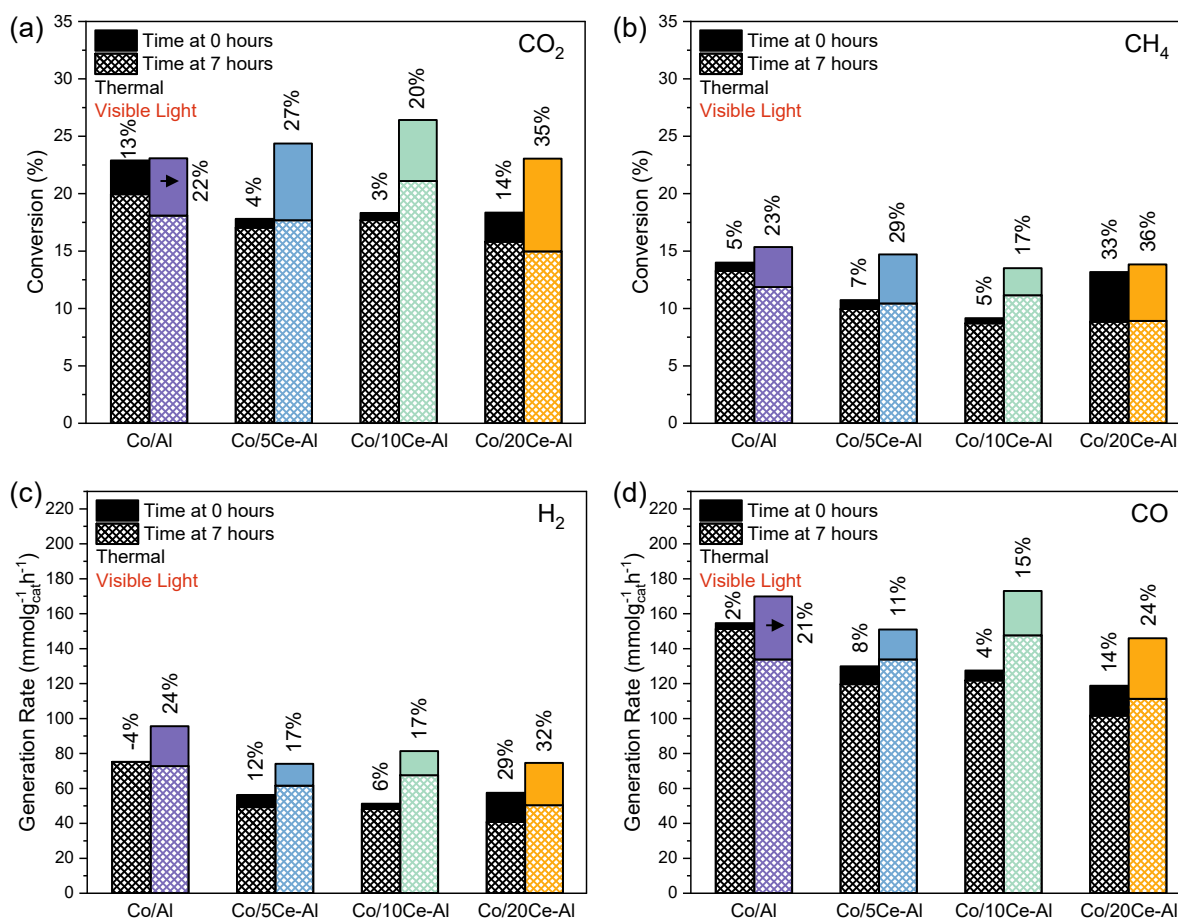

Figure S6: (a) CO<sub>2</sub> conversion, (b) CH<sub>4</sub> conversion, (c) H<sub>2</sub> generation rate and (d) CO generation rate of the Co/xCe-Al stability tests. All catalysts were reduced and passivated ex-situ for 1 h at 850 °C and then in-situ at 550 °C for 1 h. The reaction was run under thermal (black) and visible light-assisted (coloured) reaction conditions. The initial conversion/product generation is represented as ■ and the conversion after 7 h is shown as ▨. The percentages refer to the difference in activity between 0 h and 7 h. (T = 650 °C, GHSV = 12 000 h<sup>-1</sup>, CO<sub>2</sub>/CH<sub>4</sub> = 1)



S4 Thermal Gravimetric Analysis and Raman Spectroscopy

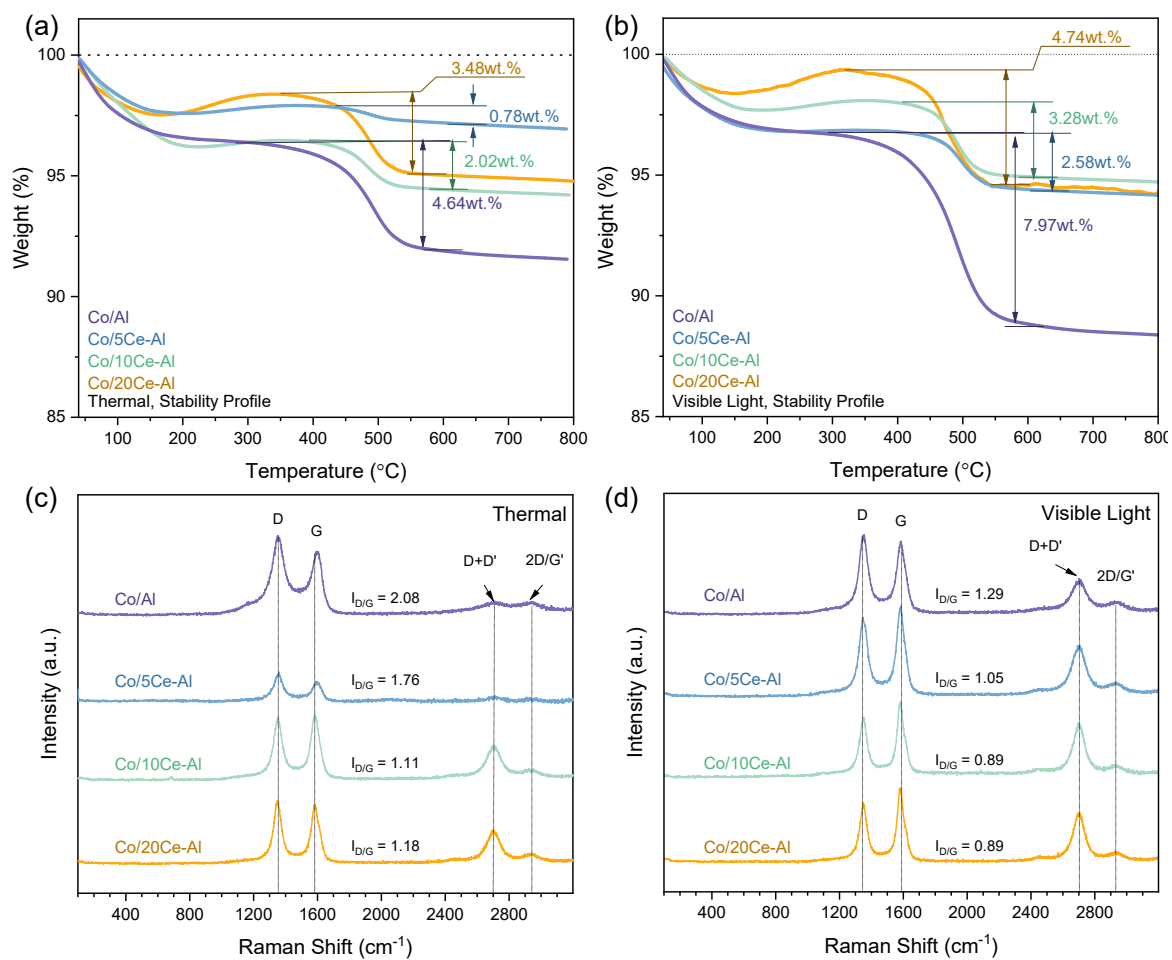

Figure S7: TGA curves of the spent Co/xCe-Al catalysts (from 7 h stability test at 650 °C) under (a) thermal and (b) visible light-assisted reaction conditions. Raman spectroscopy of the spent stability tests under (c) thermal and (d) visible light reaction conditions. The  $I_{D/G}$  ratio was calculated by integrating the prominent D and G bands.

S5 N<sub>2</sub> Physisorption Isotherms

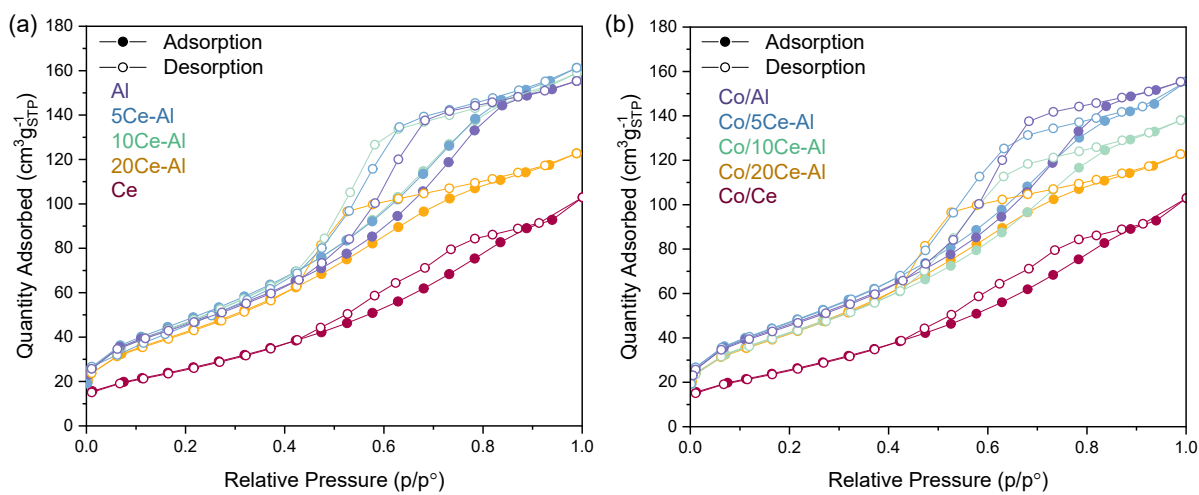

Figure S8: N<sub>2</sub> physisorption isotherms for (a) xCe-Al supports and (b) Co/xCe-Al catalysts.

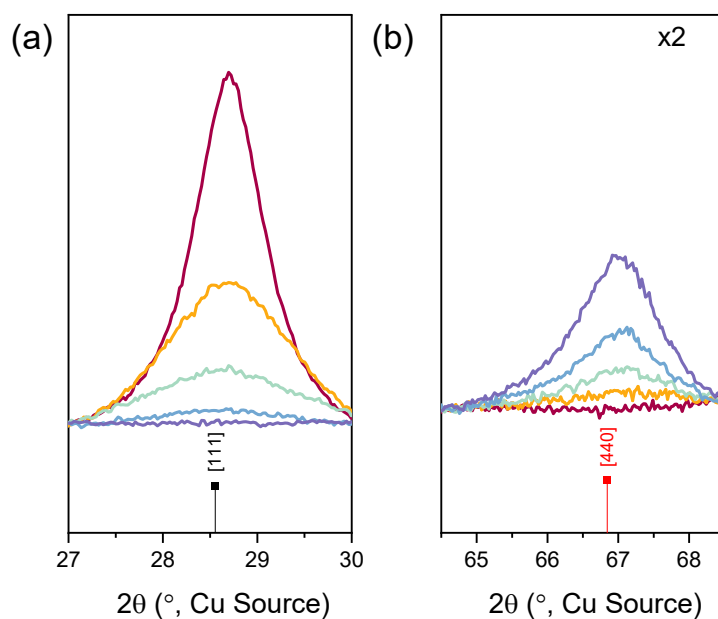

Figure S9: Overlaid X-ray diffraction patterns of the Al (purple), 5Ce-Al (blue), 10Ce-Al (green), 20Ce-Al (yellow) and Ce (red) supports for (a) ceria's (111) phase and (b) alumina's (440) phase, which was magnified to twice the initial size. This figure demonstrates the gradual decrease in the peak intensity as the concentration of Ce and Al decreases.

Table S1: XRD ceria's (111) phase and alumina's (440) phase  $2\theta$  peak positions.

| Support | CeO <sub>2</sub> Position (2 $\theta$ , °) | Al <sub>2</sub> O <sub>3</sub> Position (2 $\theta$ , °) |
|---------|--------------------------------------------|----------------------------------------------------------|
| Al      | n.d.                                       | 66.9                                                     |
| 5Ce-Al  | 28.6                                       | 66.9                                                     |
| 10Ce-Al | 28.6                                       | 67.0                                                     |
| 20Ce-Al | 28.7                                       | 67.3                                                     |
| Ce      | 28.7                                       | n.d.                                                     |

The phase quantification and experimental lattice parameters of  $\text{CeO}_2$  and  $\gamma\text{-Al}_2\text{O}_3$  were determined through Rietveld refinement. Crystallographic data was obtained from the  $\text{CeO}_2$  and  $\text{Al}_2\text{O}_3$  cards matched using X'Pert HighScore software (ICSD ref#002-8260 for  $\text{CeO}_2$  and ICSD ref#062-1707 for  $\gamma\text{-Al}_2\text{O}_3$ ). The refinement was iterated until an excellent fit was obtained ( $R_{\text{exp}} < 3$ , goodness of fit (GOF or  $\chi^2$ )  $< 5$  and  $R_B \approx 10$ ) (Table S2)<sup>3</sup>. The  $\text{CeO}_2$  data fit closely to the matched phase, as did the major crystalline peaks of  $\gamma\text{-Al}_2\text{O}_3$ , although there was consistent discrepancy for the peaks from  $35^\circ$  to  $45^\circ$  for the 10Ce-Al, 5Ce-Al, and Al supports (Figure S10). Fitting the pure alumina sample to other alumina phases ( $\eta$ ,  $\theta$ ), the inclusion of aluminium hydroxide, and multiphase analysis (combined  $\gamma$  and  $\eta/\theta$ ) only reduced the accuracy of the refinement, availing no solution. For 10Ce-Al and 5Ce-Al, the small discrepancy could be attributed to  $\text{CeAlO}_3$  (100% intensity peak (110) at  $33.7^\circ$ , ICSD ref#007-2558), however, the peaks overlap significantly, making quantitative analysis difficult. As the error was pronounced for the neat  $\text{Al}_2\text{O}_3$  support, it was unlikely that  $\text{CeAlO}_3$  caused this error. The lattice parameters were found by refining the unit cell, but meaningful understanding is limited, particularly for 5Ce-Al, 10Ce-Al and 20Ce-Al due to the  $R_B \gg 10$  (Table S2).

Table S2: Expected profile R-value ( $R_{\text{exp}}$ ), weighted profile R-value ( $R_{\text{wp}}$ ), goodness of fit (GOF) and Bragg R-value fit indicators for Rietveld refinement. Experimental  $\gamma\text{-Al}_2\text{O}_3$  and  $\text{CeO}_2$  lattice parameters.

| Support | $R_{\text{exp}}$ | $R_{\text{wp}}$ | GOF   | $R_B$                          |                | Lattice Parameter              |                |
|---------|------------------|-----------------|-------|--------------------------------|----------------|--------------------------------|----------------|
|         |                  |                 |       | $\gamma\text{-Al}_2\text{O}_3$ | $\text{CeO}_2$ | $\gamma\text{-Al}_2\text{O}_3$ | $\text{CeO}_2$ |
| Al      | 3.066            | 6.106           | 3.967 | 11.0                           | n.d.           | 7.8794                         | n.d.           |
| 5Ce-Al  | 2.510            | 3.498           | 1.911 | 14.8                           | 10.9           | 7.8810                         | 5.3567         |
| 10Ce-Al | 2.373            | 4.503           | 3.602 | 15.7                           | 13.8           | 7.8886                         | 5.4009         |
| 20Ce-Al | 2.348            | 3.503           | 2.226 | 20.9                           | 7.2            | 7.8723                         | 5.4073         |
| Ce      | 2.244            | 2.538           | 1.279 | n.d.                           | 2.7            | n.d.                           | 5.4072         |

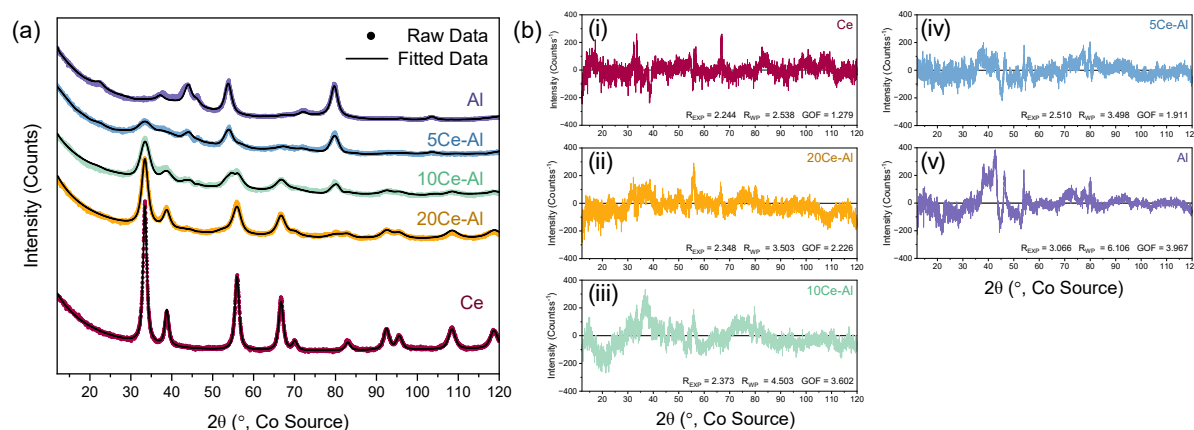

Figure S10: Rietveld refinement of the  $x\text{Ce-Al}$  supports. (a) The overall fitted data to the  $x\text{Ce-Al}$  patterns, (b) the difference plots for (i) Ce, (ii) 20Ce-Al, (iii) 10Ce-Al, (iv) 5Ce-Al and (v) Al.

Raman spectroscopy was employed to verify the change in SOV concentration with Ce incorporation and probe the vibrational modes of the xCe-Al supports. Ceria exhibited one peak at  $464\text{ cm}^{-1}$ , corresponding to the  $F_{2g}$  vibrational mode (Figure S11) <sup>4-6</sup>. Conversely,  $\gamma\text{-Al}_2\text{O}_3$  was Raman inactive <sup>7</sup>. As  $\gamma\text{-Al}_2\text{O}_3$  became the dominant phase, the intensity of ceria's  $F_{2g}$  peak diminished (relative to neat  $\text{CeO}_2$ ), as  $\text{CeO}_2$  formed a lower proportion of the scattering volume <sup>8</sup>. The  $F_{2g}$  peak did not shift significantly for 20Ce-Al and 10Ce-Al, indicating no internal lattice strain for the ceria crystallites, confirming the XRD results. The insets in Figure S11 detail two  $\text{CeO}_2$  SOV peaks corresponding to the SOV D-band at  $580 - 600\text{ cm}^{-1}$  and to the superoxide species ( $\text{O}_2^-$ ) at  $1100\text{ cm}^{-1}$ , conducive to an  $\text{O}_2$  species adsorbed onto a single electron surface oxygen vacancy <sup>4,5</sup>.

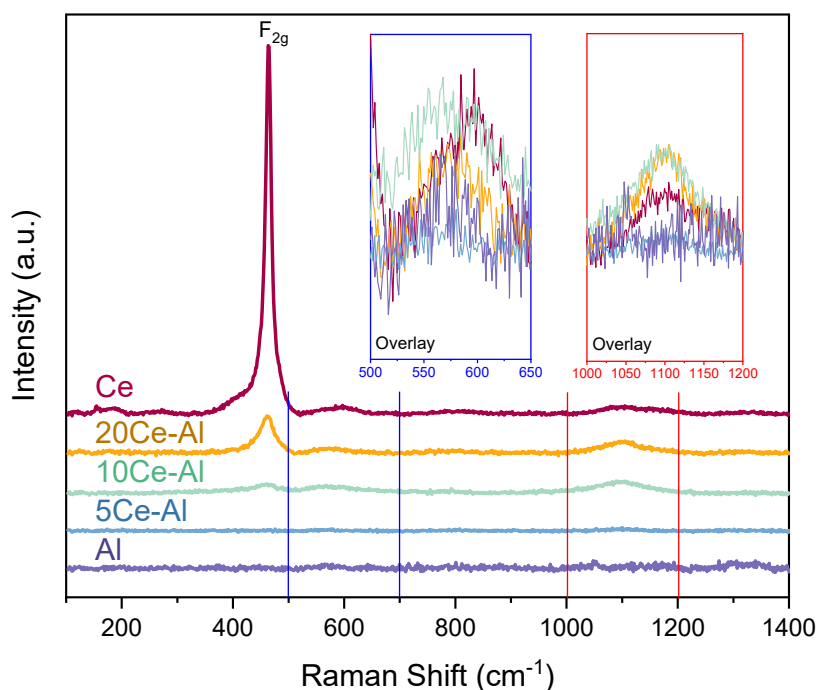

Figure S11: Raman spectroscopy of the xCe-Al supports. The insets depict two SOV peaks corresponding to the D-band vibrational mode from  $500 - 650\text{ cm}^{-1}$  and a superoxide species (oxygen adsorbed to single electron vacancy) at  $1000 - 1200\text{ cm}^{-1}$ .

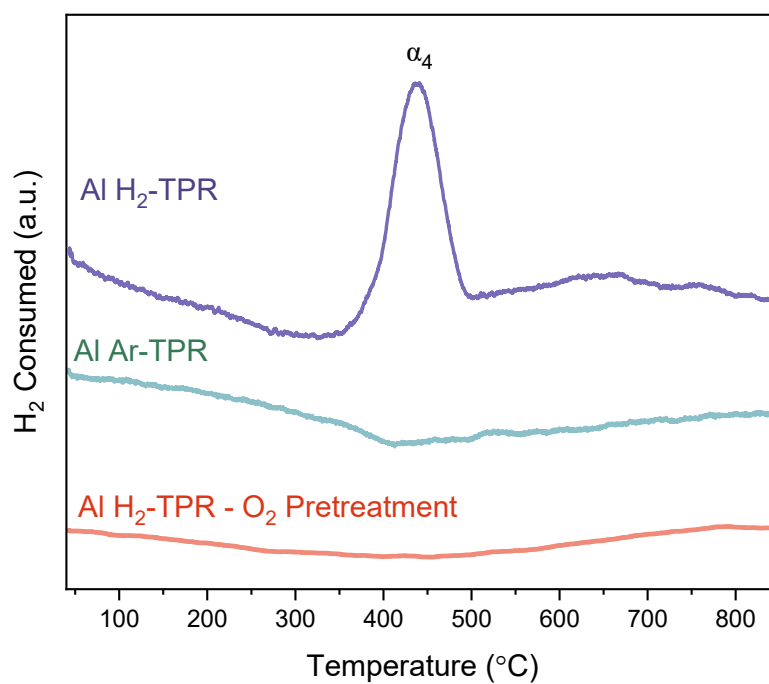

Figure S12: (a)  $\text{H}_2$ -TPR of the  $\text{Al}_2\text{O}_3$  support (purple) shows the  $\alpha_4$  peak at 440  $^\circ\text{C}$ . The Ar-TPR of the  $\text{Al}_2\text{O}_3$  support (red) indicated that the peak was not caused by the thermal decomposition of species. After pre-treating the  $\text{Al}_2\text{O}_3$  support in  $\text{O}_2$  (450  $^\circ\text{C}$  for 1 h, ramp rate of 10  $^\circ\text{Cmin}^{-1}$ ),  $\alpha_4$  disappears, indicating that the species was most likely residue from the FSP synthesis process<sup>9-11</sup>.

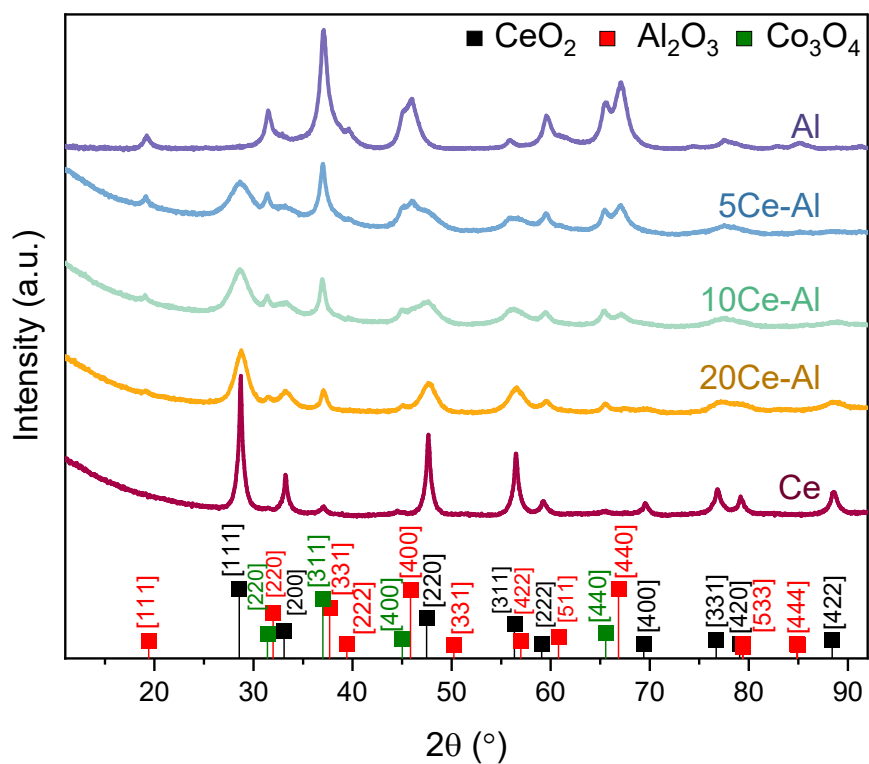

Figure S13: XRD profile of the as-prepared Co/xCe-Al catalysts, identifying the  $\text{CeO}_2$  (black ICSD ref#062-1707),  $\text{Al}_2\text{O}_3$  (red, ICSD ref#062-1707) and  $\text{Co}_3\text{O}_4$  (green, ICDD ref. #006-9374). The (440) phase of  $\text{Co}_3\text{O}_4$  was used to calculate the crystallite size, as it exhibited less overlap than the prominent (311) phase.

Table S3: Cobalt-loaded XRD ceria's (111), alumina's (440) and cobalt's (440) phase  $2\theta$  peak positions.

| Catalyst   | $\text{CeO}_2$ Position ( $2\theta$ , °) | $\text{Al}_2\text{O}_3$ Position ( $2\theta$ , °) | $\text{Co}_3\text{O}_4$ Position ( $2\theta$ , °) |
|------------|------------------------------------------|---------------------------------------------------|---------------------------------------------------|
| Co/Al      | n.d.                                     | 67.0                                              | 65.5                                              |
| Co/5Ce-Al  | 28.6                                     | 67.0                                              | 65.4                                              |
| Co/10Ce-Al | 28.6                                     | 67.0                                              | 65.4                                              |
| Co/20Ce-Al | 28.7                                     | 67.5                                              | 65.5                                              |
| Co/Ce      | 28.7                                     | n.d.                                              | 65.4                                              |

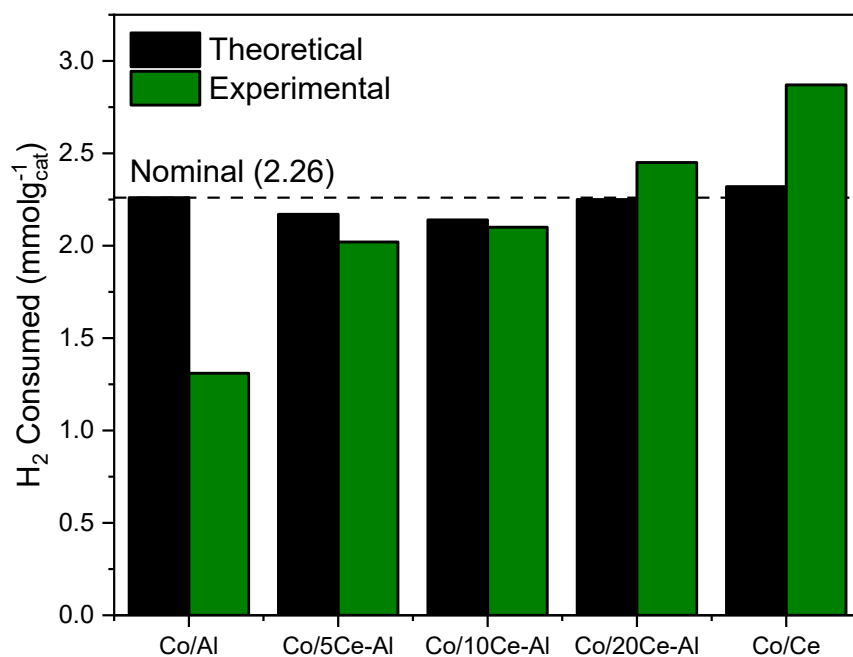

Figure S14: Comparison between the theoretical and the experimental hydrogen consumed. All calculations were performed using the actual Co loading, and the nominal H<sub>2</sub> consumed assumes a loading of 10.0 wt% Co.

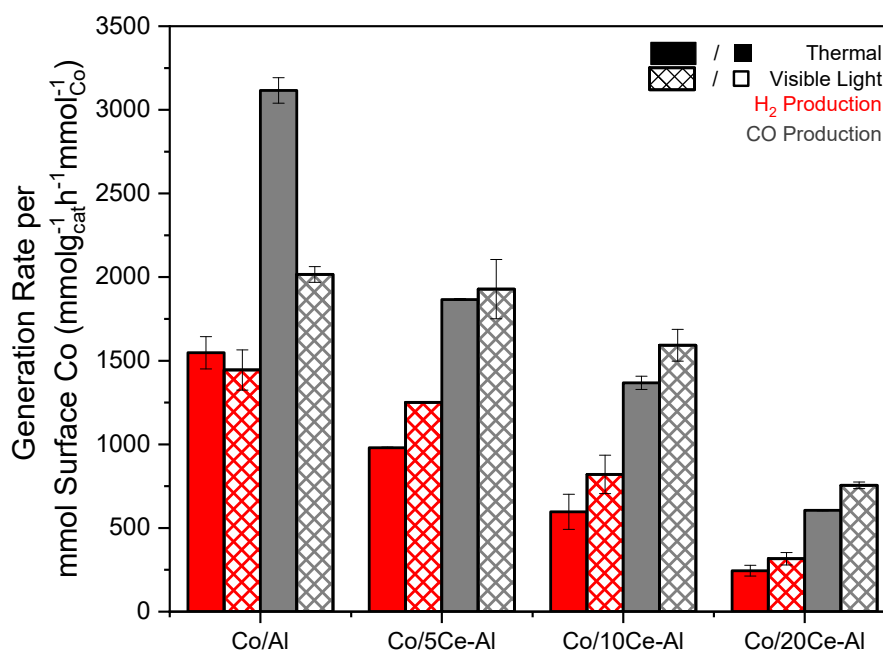

Figure S15: The H<sub>2</sub> (red) and CO (grey) production rates under thermal (■) and visible light-assisted (▨) reaction conditions when normalised to the amount of surface cobalt, as determined by XPS. The results highlight that the negative influence of Ce on the activity far outweighs the loss of Co from strong CoO anchoring to Al<sub>2</sub>O<sub>3</sub>.



Table S4: %Ce<sup>3+</sup> (relative to Ce<sup>4+</sup>) and ratio between Co<sup>3+</sup> and Co<sup>2+</sup> determined through XPS.

| <b>Catalyst</b>   | <b>% Ce<sup>3+</sup> (Relative to Ce<sup>4+</sup>)</b> | <b>Co<sup>3+</sup>/Co<sup>2+</sup> Ratio</b> |
|-------------------|--------------------------------------------------------|----------------------------------------------|
| <b>Co/Al</b>      | n.d.                                                   | 0.21                                         |
| <b>Co/5Ce-Al</b>  | 41                                                     | 0.33                                         |
| <b>Co/10Ce-Al</b> | 29                                                     | 0.46                                         |
| <b>Co/20Ce-Al</b> | 29                                                     | 0.67                                         |
| <b>Co/Ce</b>      | 16                                                     | 0.30                                         |

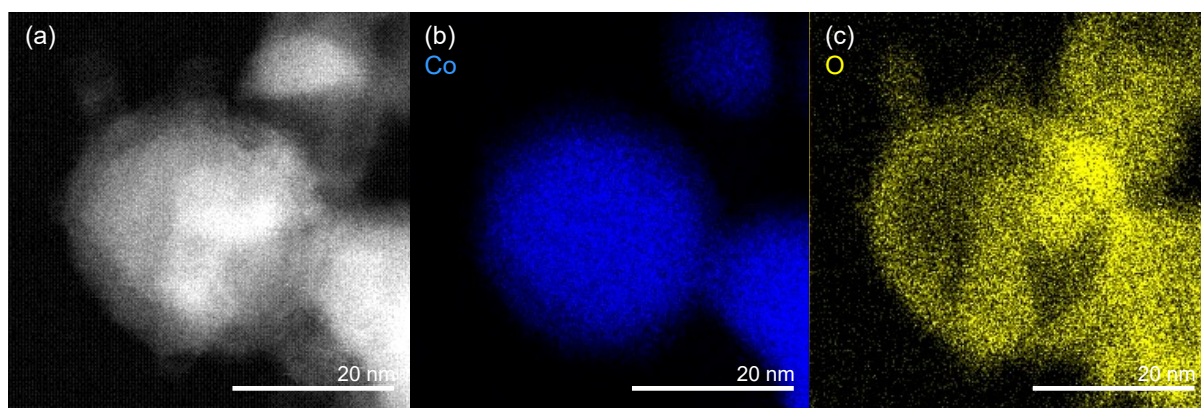

Figure S16: (a) 20 nm HAADF micrograph (b) Co EDS elemental map and (c) O EDS elemental map of a cobalt deposit (reduced and passivated Co/20Ce-Al catalyst), showing a cobalt oxide (likely  $\text{Co}_3\text{O}_4$ ) passivation layer around a metallic cobalt core.

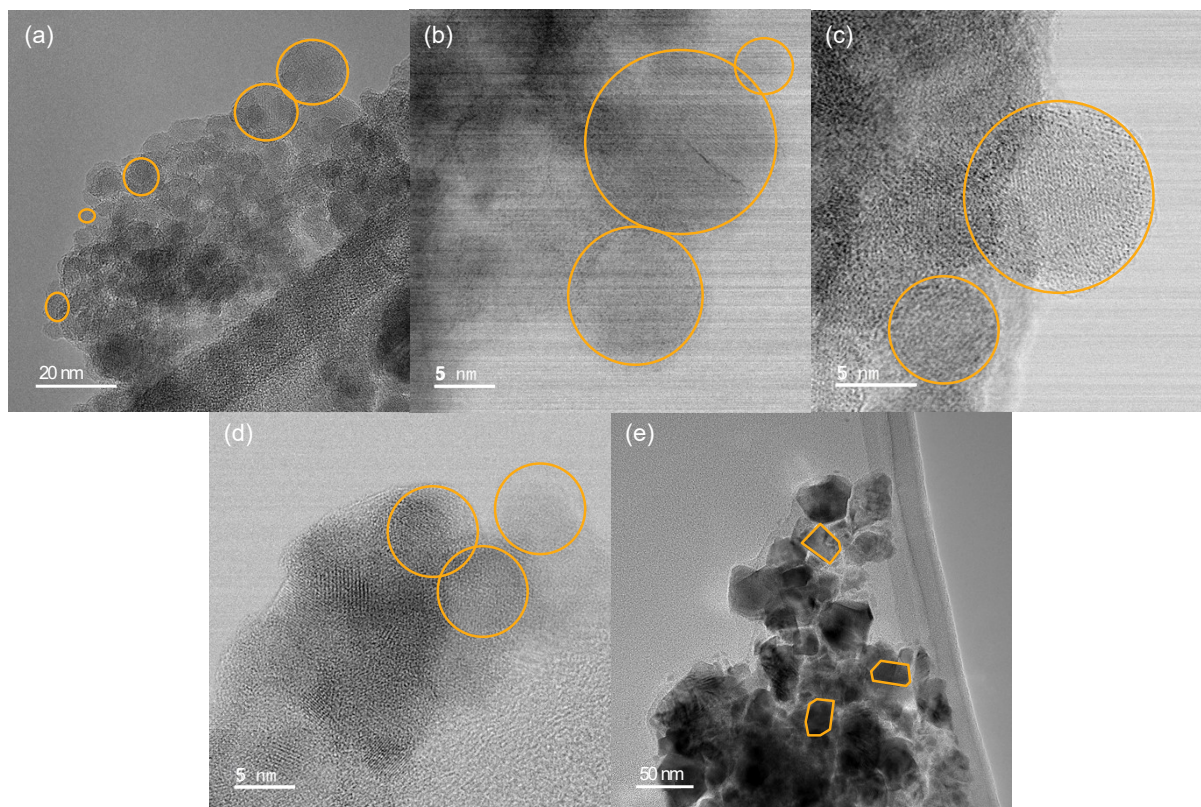

Figure S17: HR-TEM micrographs for the reduced and passivated (a) Co/Al, (b) Co/5Ce-Al, (c) Co/10Ce-Al, (d) Co/20Ce-Al and (e) Co/Ce control. The morphology of individual particles is outlined in yellow, demonstrating that all alumina samples contain spherical alumina crystals. The  $\text{CeO}_2$  support, which is polyhedral in shape, is the only exception. The scale is represented on each micrograph.

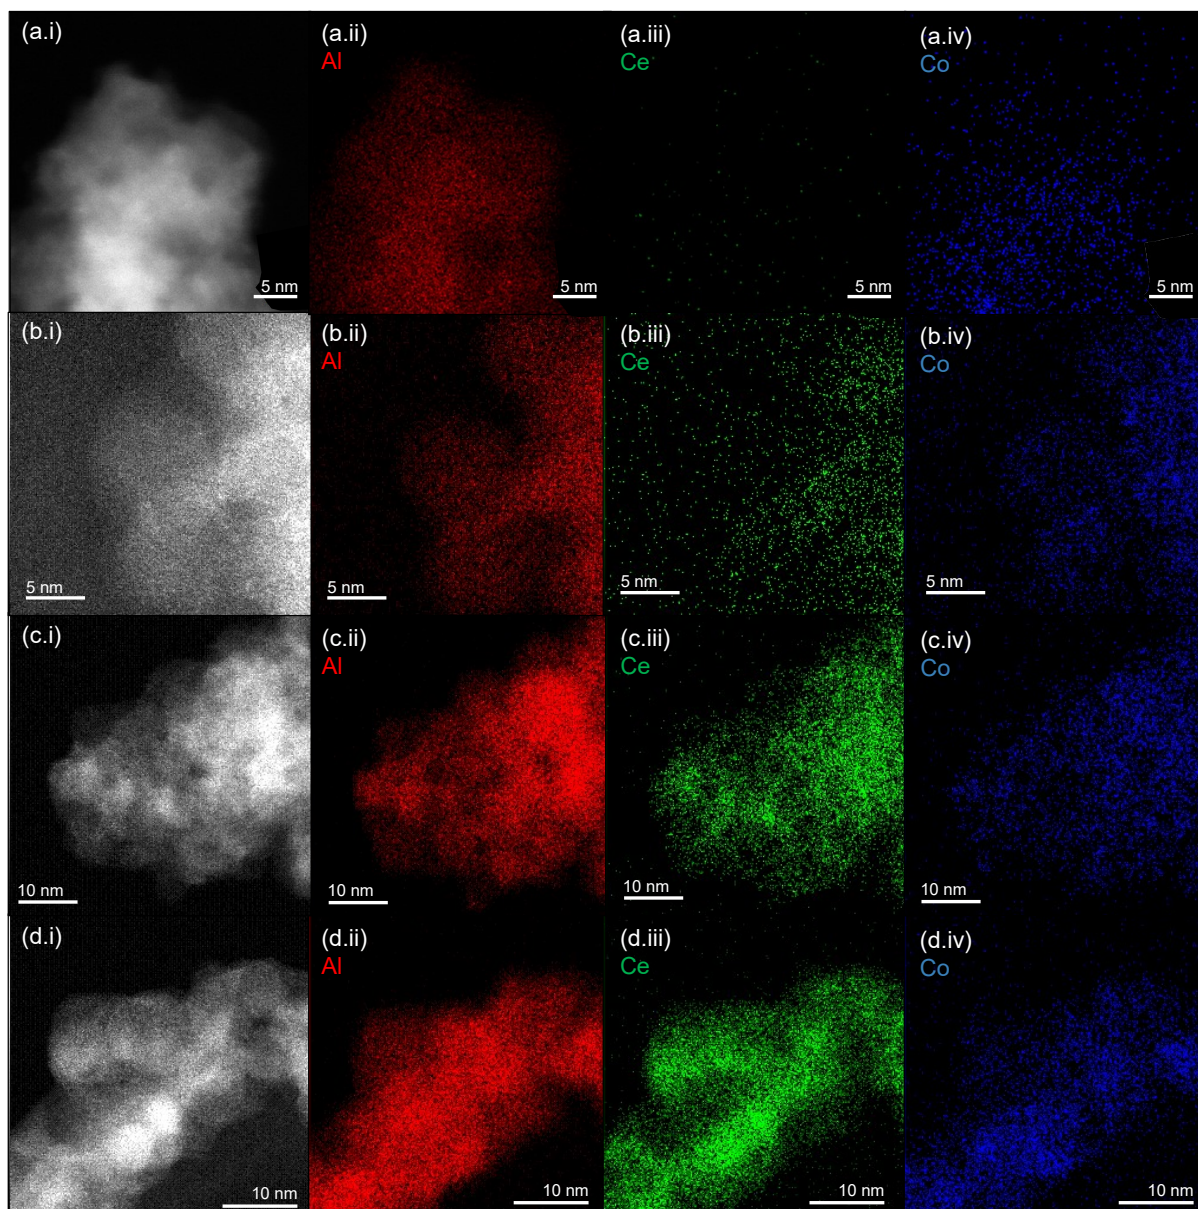

Figure S18: EDS mapping of the reduced and passivated (a) Co/Al, (b) Co/5Ce-Al, (c) Co/10Ce-Al and (d) Co/20Ce-Al, showing (i) the HAADF image, and the maps of (ii) Al, (iii) Ce and (iv) Co. The scale is represented on each image.

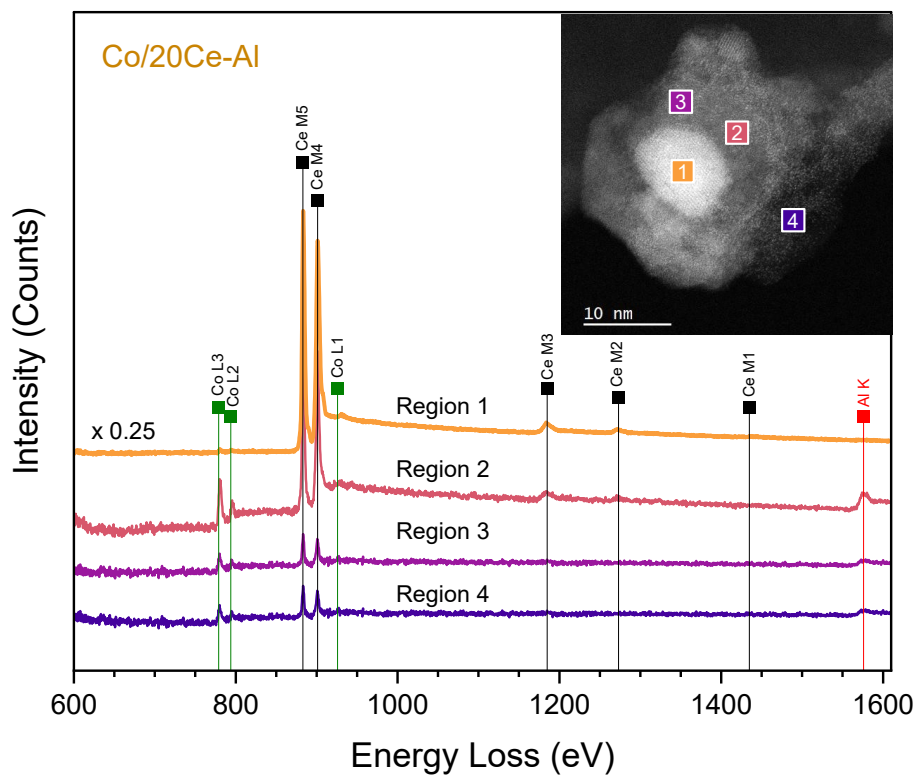

Figure S19: EELS spectra of the reduced and passivated Co/20Ce-Al catalyst. The EELS was recorded for four regions in close proximity, as identified by the HAADF inset.

The Co deposit size was estimated by using the ImageJ software to measure the width of the carbon whiskers formed throughout the reaction. There was some variation in the whisker carbon diameter. In some instances, the width closely aligned with the diameter of the Co deposit (Figure S20a), but at other times, it was approximately 30% larger (Figure S20b and c), indicating the potential for overestimation of the Co deposit size. The size was measured from at least 400 different whiskers for each catalyst, and the distribution is provided in Figure S21.

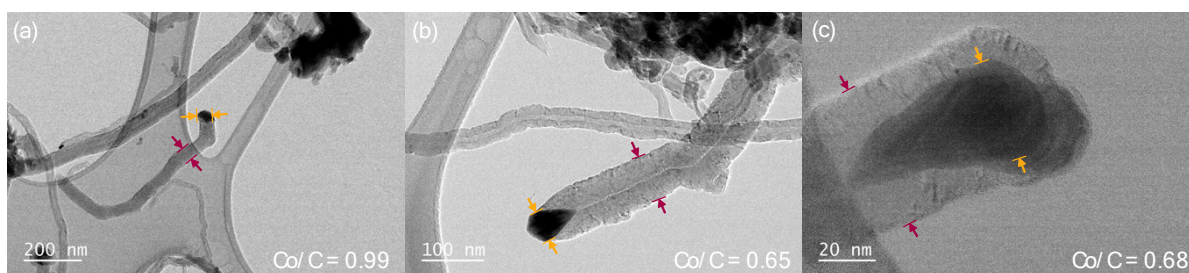

Figure S20: Comparison between the Co deposit ('Co') width and the carbon nanotube ('C') width of the spent catalysts. TEM images are of the spent Co/10Ce-Al ((a) and (b)) and Co/20Ce-Al (c) catalysts.

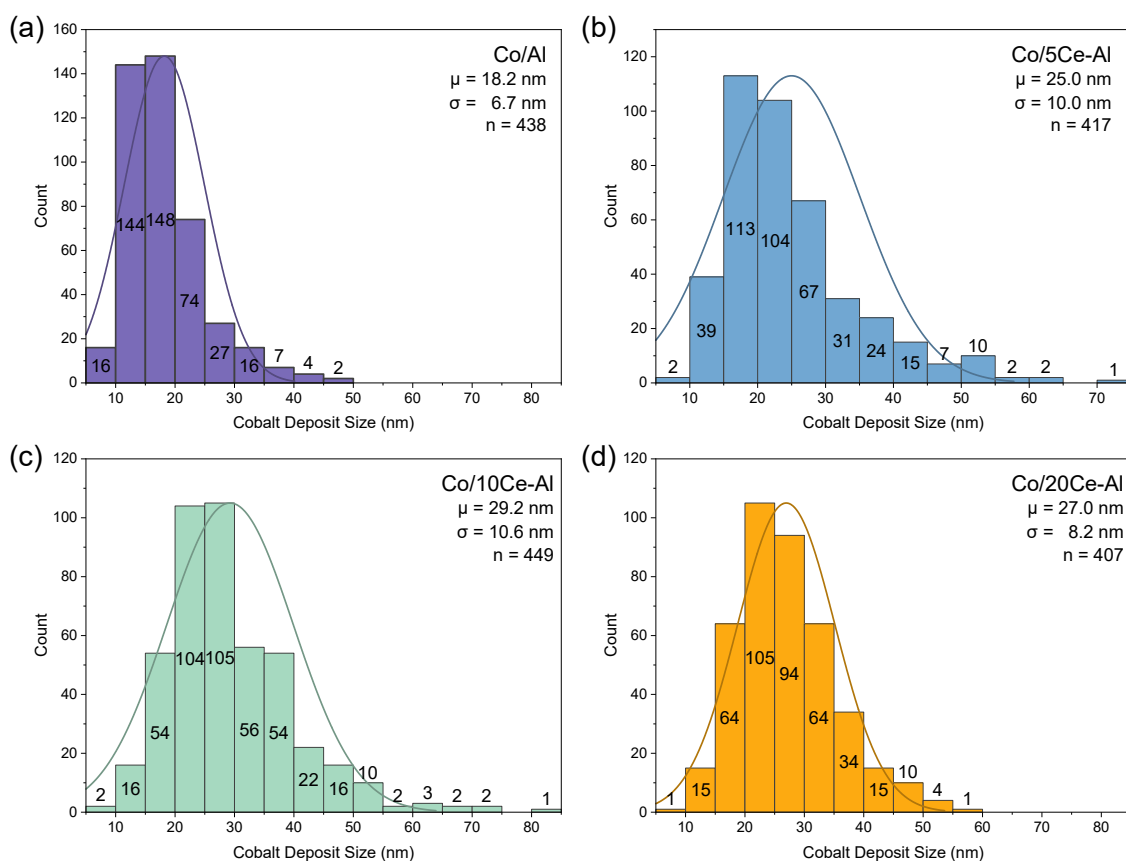

Figure S21: Co Size distribution of the spent (a) Co/Al, (b) Co/5Ce-Al, (c) Co/10Ce-Al and (d) Co/20Ce-Al catalysts.

Table S5: In-situ DRIFTS peak assignment for  $\text{Al}_2\text{O}_3$  and  $\text{CeO}_2$  supported catalysts in literature.

| Assigned Species                                                           | Vibrational Mode: Wavenumber ( $\text{cm}^{-1}$ )                                                                                                                                                                      |         |                                                                                                                                                                                                                                             |          |
|----------------------------------------------------------------------------|------------------------------------------------------------------------------------------------------------------------------------------------------------------------------------------------------------------------|---------|---------------------------------------------------------------------------------------------------------------------------------------------------------------------------------------------------------------------------------------------|----------|
|                                                                            | $\text{Al}_2\text{O}_3$ Support                                                                                                                                                                                        | Ref.    | $\text{CeO}_2$ Support                                                                                                                                                                                                                      | Ref.     |
| Gaseous Species                                                            |                                                                                                                                                                                                                        |         |                                                                                                                                                                                                                                             |          |
| CO                                                                         | $\nu(\text{CO})$ : 2143                                                                                                                                                                                                | 9,12    | $\nu(\text{CO})$ : 2143                                                                                                                                                                                                                     | 12       |
| $\text{CO}_2$                                                              | $\nu(\text{CO})$ : 2200 – 2400                                                                                                                                                                                         | 10      | $\nu(\text{CO})$ : 2200 – 2400                                                                                                                                                                                                              | 13,14    |
| $\text{CH}_4$                                                              | $\nu(\text{CH})$ : 3016<br>$\delta(\text{CH})$ : 1305                                                                                                                                                                  | 10      | $\nu(\text{CH})$ : 3016<br>$\delta(\text{CH})$ : 1305                                                                                                                                                                                       | 13,14    |
| Surface Adsorbed Carbonyls (C = O) and Carbonates ( $\text{CO}_3$ ) and CO |                                                                                                                                                                                                                        |         |                                                                                                                                                                                                                                             |          |
| Bidentate Carbonate [B]                                                    | $\nu_{\text{as}}(\text{OCO})$ : 1665 – 1690<br>$\nu_{\text{s}}(\text{OCO})$ : 1308 – 1350                                                                                                                              | 9,11    | $\nu_{\text{as}}(\text{OCO})$ : 1545 – 1580<br>$\nu_{\text{s}}(\text{OCO})$ : 1289 – 1300                                                                                                                                                   | 13,14    |
| Bridged Carbonate [Br]                                                     | $\nu_{\text{as}}(\text{OCO})$ : 1700<br>$\nu_{\text{s}}(\text{OCO})$ : 1300 – 1310                                                                                                                                     | 11      | $\nu_{\text{as}}(\text{OCO})$ : 1736<br>$\nu_{\text{s}}(\text{OCO})$ : 1135                                                                                                                                                                 | 15,16    |
| CO on $\text{Co}^0$ [ $\text{CO}_{\text{ads}}$ ]                           | $\nu(\text{CO})$ : 1800 – 2080                                                                                                                                                                                         | 9,10,12 | $\nu(\text{CO})$ : 1940 – 2000                                                                                                                                                                                                              | 14,17    |
| $\text{CH}_x\text{O}$ ( $x = 1 - 3$ )                                      | $\nu(\text{CO})$ : 1750                                                                                                                                                                                                | 18,19   | $\nu(\text{CH})$ : 2840<br>$\nu(\text{CO})$ : 1100                                                                                                                                                                                          | 20       |
| Hydrogen Carbonate (Bicarbonate) [H]                                       | $\nu_{\text{as}}(\text{OCO})$ : 1627 – 1657<br>$\delta(\text{COH})$ : 1435 – 1445<br>$\nu_{\text{s}}(\text{OCO})$ : 1225 – 1236                                                                                        | 9-11    | $\nu_{\text{as}}(\text{OCO})$ : 1599 – 1613<br>$\nu_{\text{s}}(\text{OCO})$ : 1391 – 1413<br>$\delta(\text{COH})$ : 1216 – 1218                                                                                                             | 13,14    |
| Formate [F]                                                                | $\delta(\text{CH})$ : 2998<br>$\nu(\text{CH})$ : 2905 – 2907<br>$\delta(\text{CH})$ : 2768<br>$\nu_{\text{as}}(\text{OCO})$ : 1593 – 1597<br>$\delta(\text{COH})$ : 1392<br>$\nu_{\text{s}}(\text{OCO})$ : 1372 – 1375 | 9,10    | $\delta(\text{CH})$ : 2955 – 2974<br>$\nu(\text{CH})$ : 2845 – 2852<br>$\delta(\text{CH})$ : 2735 – 2751<br>$\nu_{\text{as}}(\text{OCO})$ : 1547 – 1584<br>$\delta(\text{COH})$ : 1369 – 1373<br>$\nu_{\text{s}}(\text{OCO})$ : 1329 – 1360 | 13,14    |
| Methoxy [MO]                                                               | $\nu(\text{CH})$ : 2841<br>$\nu(\text{CO})$ : 1097 – 1109                                                                                                                                                              | 21      | $\nu(\text{CH})$ : 2830<br>$\nu(\text{CO})$ : 1000 – 1100<br>$\nu(\text{CO})$ : 850                                                                                                                                                         | 20,22,23 |
| Monodentate Carbonate [M]                                                  | $\nu_{\text{as}}(\text{OCO})$ : 1510 – 1550<br>$\nu_{\text{s}}(\text{OCO})$ : 1370 – 1390                                                                                                                              | 9,11    | $\nu_{\text{as}}(\text{OCO})$ : 1504<br>$\nu_{\text{s}}(\text{OCO})$ : 1351                                                                                                                                                                 | 15,16    |
| Polydentate Carbonate [P]                                                  | n.d.                                                                                                                                                                                                                   |         | $\nu_{\text{as}}(\text{OCO})$ : 1456 – 1490<br>$\nu(\text{OCO})$ : 1348 – 1380                                                                                                                                                              | 14,17    |

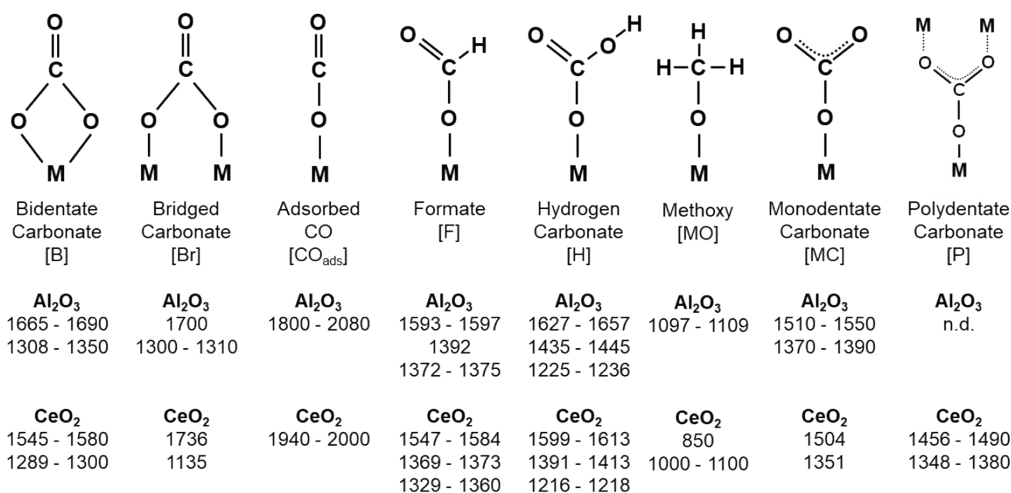Figure S22: Molecular structure of adsorbed carbonyl and carbonate species with corresponding peak positions for  $\text{Al}_2\text{O}_3$  and  $\text{CeO}_2$ . Image adapted from O'Connell et al. <sup>14</sup>.

*In-situ* DRIFTS was performed on the Co/Al and Co/10Ce-Al catalysts to understand changes in the reaction mechanism with Ce incorporation and visible light illumination. Several sources were used to identify the vibrational modes of possible intermediates over Al<sub>2</sub>O<sub>3</sub> and CeO<sub>2</sub> (Table S5, Figure S22). The catalyst was diluted with commercial  $\gamma$ -Al<sub>2</sub>O<sub>3</sub> to prevent carbon build-up and clogging of the *in-situ* cell. The activity results identified a small concentration of H<sub>2</sub> and CO at 500 °C, so the DRIFTS spectra were obtained at 350, 450 and 550 °C, representing the surface adsorbed species before the reaction commenced, as the reaction began and after the reaction commenced.

Within the C–O fingerprint region (2200 – 1000 cm<sup>-1</sup>, Figure S23a), singularly coordinated carbonyl species such as hydrogen carbonate (HCO<sub>3</sub><sup>-</sup>, 'H' –  $v_{as}(\text{OCO}) = 1650 \text{ cm}^{-1}$ ,  $\delta(\text{COH}) = 1444 \text{ cm}^{-1}$ ), formate ('F' –  $v_{as}(\text{OCO}) = 1591 \text{ cm}^{-1}$ ,  $\delta(\text{COH}) = 1392 \text{ cm}^{-1}$ ,  $v_s(\text{OCO}) = 1351 \text{ cm}^{-1}$ ) and monodentate carbonate ('M' –  $v_{as}(\text{OCO}) = 1518 \text{ cm}^{-1}$ ,  $v_s(\text{OCO}) = 1351 \text{ cm}^{-1}$ ) were evident. There was no evidence of the methoxy ( $v(\text{CH}) \approx 2840 \text{ cm}^{-1}$ ,  $v(\text{CO}) \approx 1100 \text{ cm}^{-1}$ ) or CH<sub>x</sub>O ( $v(\text{CO}) \approx 1750 \text{ cm}^{-1}$ )<sup>18,19</sup>, indicating that the species may not be present for this catalytic system. Peak deconvolution of the C-O region was challenging, as many peaks overlapped. In the O–H/C–H region (3800 – 2500 cm<sup>-1</sup>, Figure S23b), several peaks were evident (3732, 3700, 3627 and 3596 cm<sup>-1</sup>) attributed to the stretching bands surface hydroxyl species of Al<sub>2</sub>O<sub>3</sub><sup>11,12</sup>. The C-H region was dominated by the stretching vibration of gaseous CH<sub>4</sub> (3015 cm<sup>-1</sup>) and corresponding combination bands spanning 2800 – 3200 cm<sup>-1</sup><sup>14</sup>. The intensity of these combination bands obscured all  $v(\text{CH})$  vibrational modes of the other adsorbed species. The  $\delta(\text{COH})$  mode of CH<sub>4</sub> gas was evident in the C-O fingerprint region at 1305 cm<sup>-1</sup>.

Before the reaction commenced (i.e. at 350 °C), the thermal Co/Al catalyst demonstrated strong HCO<sub>3</sub><sup>-</sup>, formate and monodentate carbonate peaks (red line, Figure S23a). As the temperature increased to 450 °C, the intensity of the HCO<sub>3</sub><sup>-</sup> and formate vibrational modes both diminished, indicating that both species are involved in the reaction mechanism. The asymmetrical stretching band of monodentate carbonate exhibited no change between 350 °C and 550 °C, indicating the species was either in dynamic equilibrium or inactive. After purging with Ar for 1 h at 550 °C, the monodentate carbonate remained, signifying that the species was unreactive at these temperatures (Figure S24). A single CO peak corresponding to CO adsorbed onto metallic Co was evident at ~ 1970 cm<sup>-1</sup>, which decreased in intensity as the temperature increased, suggesting that removing CO<sub>ads</sub> is not an energy-intensive reaction step. Interestingly, at 550 °C, two vibrational peaks appeared at 2110 and 2177 cm<sup>-1</sup>. These peaks are assigned to the high oxidation state cations of Co<sup>2+</sup> and Al<sup>3+</sup> (exposed Al<sup>3+</sup> coordinated octahedrally)<sup>12</sup>. Ji et al. suggested that these peaks represent CO<sub>ads</sub> donating an electron to the Al<sup>3+</sup> and Co<sup>2+</sup> sites through a  $\sigma$  coordination bond<sup>12</sup>.

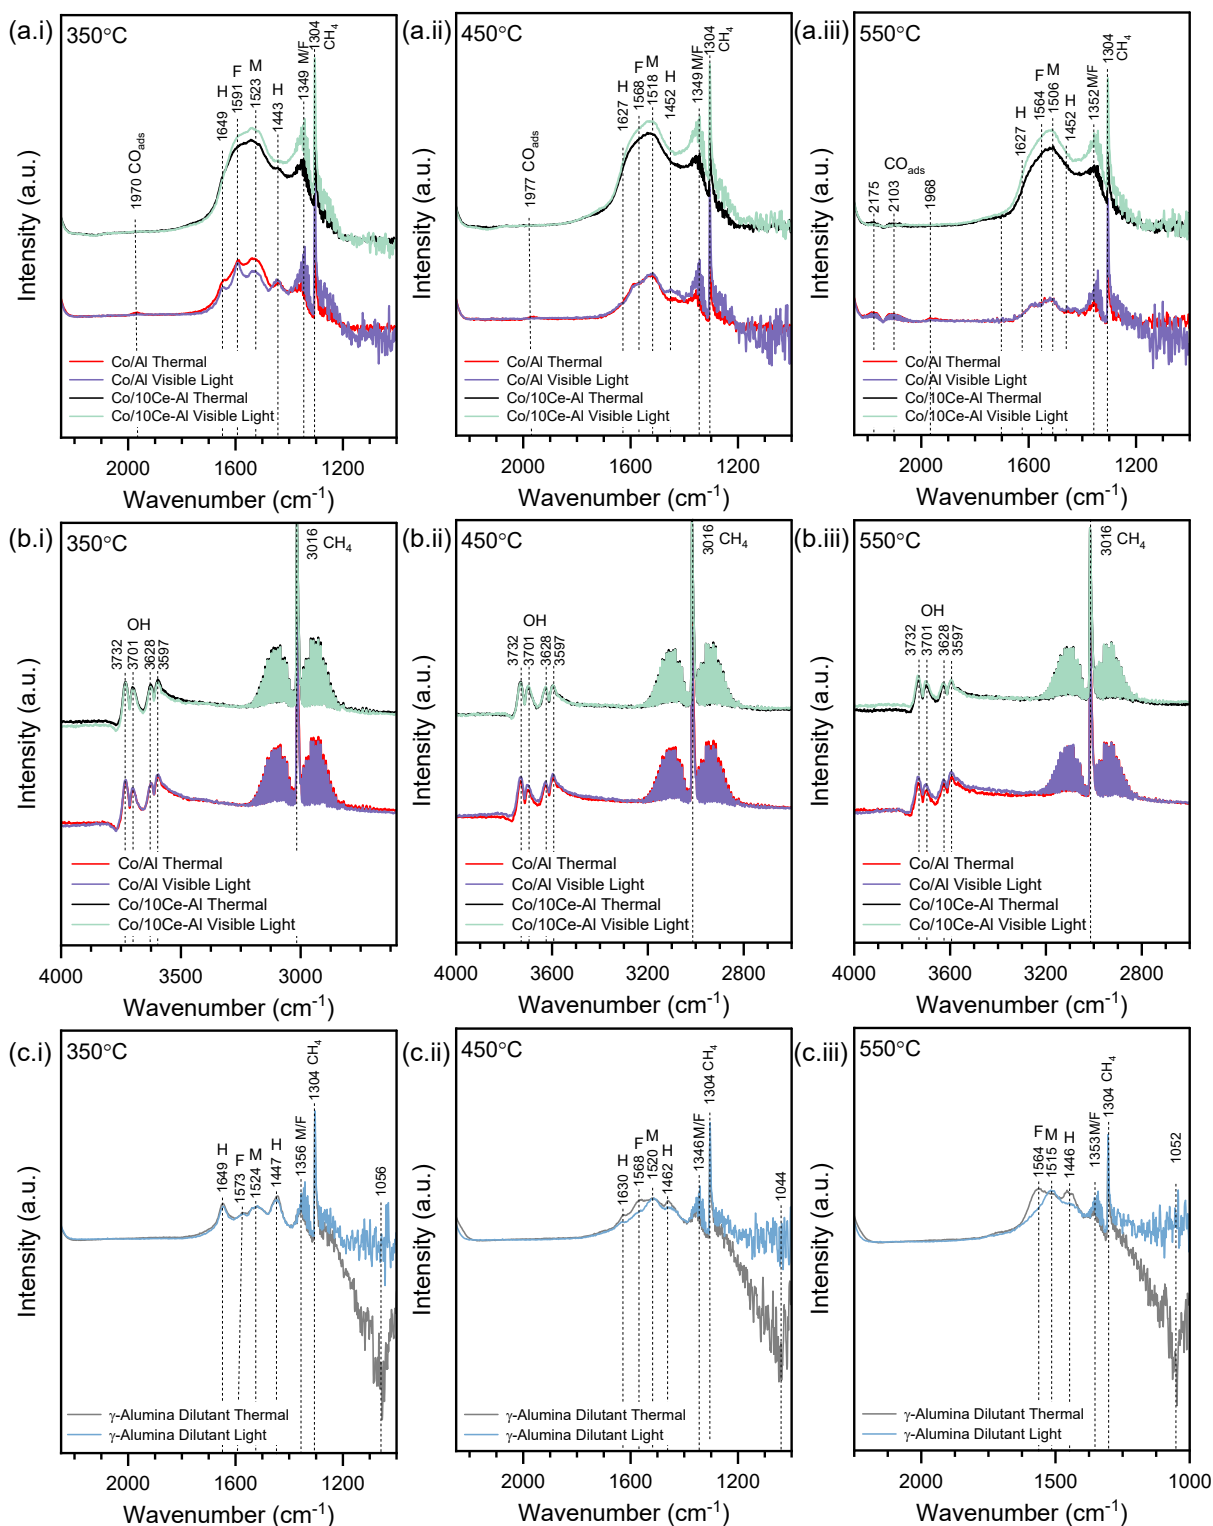



Besides an intensity increase, the surface adsorbed species in the C-O fingerprint region for Co/10Ce-Al (black line, Figure S23a) were akin to the Co/Al catalyst under thermal conditions. Like Co/Al,  $\text{HCO}_3^-$  and formate were evident at 350 °C before the reaction and reduced significantly in intensity by 550 °C, signifying no change in the active species with Ce incorporation. Monodentate carbonate was also an inactive species at this temperature. Before the reaction commenced, a broad  $\text{CO}_{\text{ads}}$  peak was observed, corresponding to linearly adsorbed CO. This peak decreased by 450 °C before disappearing before 550 °C, indicating that the species was active. The  $\nu(\text{CO})$  mode of adsorbed CO was scarcely evident at 350 and 450 °C.  $\text{CO}_{\text{ads}}$  disappeared entirely by 550 °C, inferring that the removal of CO is rapid and therefore unmeasurable for these equilibria spectra.

Upon illumination with visible light ( $400 < \lambda < 780 \text{ nm}$ ,  $I_v = 40 \text{ mWcm}^{-2}$ ), there was no significant change in the Co/Al spectra (purple line, Figure S23a) bar a marginal decrease in the amount of hydrogen carbonate at 450 °C. On the contrary, Co/10Ce-Al (green line, Figure S23a) exhibited an increase in the formate and monodentate carbonate species and no change to  $\text{HCO}_3^-$  at 350 °C. *In-situ* DRIFTS of the similar Sabatier reaction demonstrated the same impact in the presence of  $\text{CeO}_2$ , whereby the visible light illumination facilitated the stabilisation of the formate intermediate through enhanced  $\text{H}_2$  disassociation<sup>14,24</sup>. Furthermore, at 350 °C, the  $\text{CO}_{\text{ads}}$  vibrational mode at 1970  $\text{cm}^{-1}$  was no longer evident for either catalyst, indicating that the light promotes its release. Once the reaction commenced by 550 °C, illumination with visible light prompted a negligible decrease in the surface adsorbed material (beyond thermal effects). Figure S23a and b show comparable thermal and visible light-assisted activity. The small improvement in activity under light for Ce-incorporated materials was only evident at 600 °C when sufficient energy was provided to catalyse the reaction. The lack of changes in both C–O and O–H/C–H regions upon illumination indicates that the light had no significant impact on the reaction mechanism.

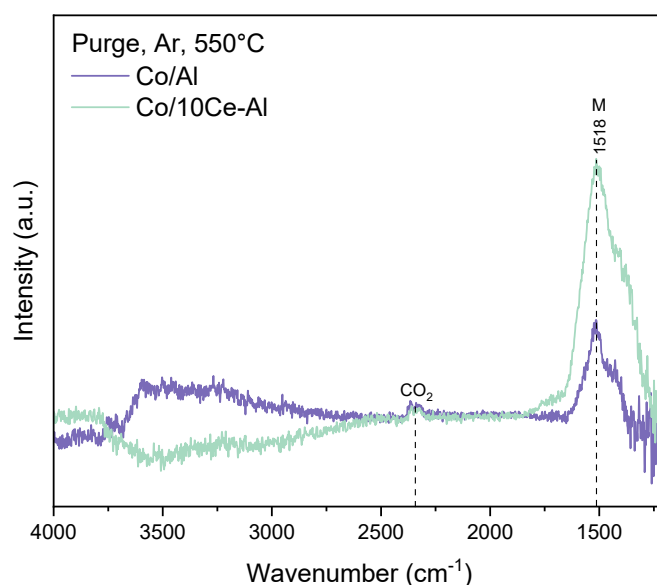

Figure S24: Residual species after purging the Co/Al and Co/10Ce-Al surface with Ar ( $24 \text{ mLmin}^{-1}$ ) for 1 h at 550 °C, after the *in-situ* DRIFTS of the reaction (both taken under visible light conditions). The purpose of the purge was to remove any weakly adsorbed and inactive material from the surface. Monodentate carbonate 'M' and residual  $\text{CO}_2$  were all that remained.

The catalysts were diluted in a 1/1 ratio with commercial  $\gamma$ - $\text{Al}_2\text{O}_3$  to limit carbon build-up and prevent reactor blockages. *In-situ* DRIFTS was performed on the dilutant to identify its contribution to surface-adsorbed species. Under thermal conditions (grey line, Figure S23c), there was a small concentration of monodentate carbonate, hydrogen carbonate, and formate species in positions comparable to the Co/Al catalyst. Relative to the other species, the hydrogen carbonate exhibited a stronger intensity at 350 °C, which decreased with temperature. Conversely, the monodentate carbonate peak increased with temperature, suggesting that the hydrogen carbonate decomposed to form monodentate carbonate. A significant negative peak was evident at  $\sim 1050\text{ cm}^{-1}$ , which is attributed to the dehydroxylation of  $\text{Al}_2\text{O}_3$ <sup>25</sup>. This peak was not evident upon illumination (blue, Figure S23c), indicating that light prevented the dilutant dehydroxylation. At 350 °C, there were no changes under light, but the concentrations of formate and hydrogen carbonate decreased, and the monodentate carbonate species increased, indicating that light likely promoted the formation of monodentate carbonate species.

- 1 Z. Liu, J. Li, M. Buettner, R. V Ranganathan, M. Uddi and R. Wang, *ACS Appl Mater Interfaces*, 2019, **11**, 17035–17049.
- 2 L. Mädler, H. K. Kammler, R. Mueller and S. E. Pratsinis, *J Aerosol Sci*, 2002, **33**, 369–389.
- 3 R. A. Young and D. B. Wiles, *Advances in X-ray Analysis*, 1980, **24**, 1–23.
- 4 S. Loridant, *Catal Today*, 2021, **373**, 98–111.
- 5 A. A. Esmailpour, S. Moradi, J. Yun, J. Scott and R. Amal, *Catal Sci Technol*, 2019, **9**, 5979–5990.
- 6 Q. Zhang, M. Mao, Y. Li, Y. Yang, H. Huang, Z. Jiang, Q. Hu, S. Wu and X. Zhao, *Appl Catal B*, 2018, **239**, 555–564.
- 7 A. Choya, B. de Rivas, J. R. González-Velasco, J. I. Gutiérrez-Ortiz and R. López-Fonseca, *Appl Catal A Gen*, 2020, **591**, 117381.
- 8 K. Kneipp, *Phys Today*, 2007, **60**, 40–46.
- 9 T. Das and G. Deo, *J Mol Catal A Chem*, 2011, **350**, 75–82.
- 10 L. Falbo, C. G. Visconti, L. Lietti and J. Szanyi, *Appl Catal B*, 2019, **256**, 117791.
- 11 X. Wang, M. Shen, L. Song, Y. Su and J. Wang, *Physical Chemistry Chemical Physics*, 2011, **13**, 15589–15596.
- 12 L. Ji, J. Lin and H. C. Zeng, *J Phys Chem B*, 2000, **104**, 1783–1790.
- 13 T. H. Nguyen, H. B. Kim and E. D. Park, *Catalysts*, 2022, **12**, 212.
- 14 G. E. P. O’Connell, T. H. Tan, J. A. Yuwono, Y. Wang, A. Kheradmand, Y. Jiang, P. V Kumar, R. Amal, J. Scott and E. C. Lovell, *Appl Catal B*, 2024, **343**, 123507.
- 15 A. Cárdenas-Arenas, A. Quindimil, A. Davó-Quiñonero, E. Bailón-García, D. Lozano-Castello, U. De-La-Torre, B. Pereda-Ayo, J. A. González-Marcos, J. R. González-Velasco and A. Bueno-López, *Appl Catal B*, 2020, **265**, 118538.
- 16 C. Binet, M. Daturi and J.-C. Lavalley, *Catal Today*, 1999, **50**, 207–225.
- 17 K. Deng, L. Lin, N. Rui, D. Vovchok, F. Zhang, S. Zhang, S. D. Senanayake, T. Kim and J. A. Rodriguez, *Catal Sci Technol*, 2020, **10**, 6468–6482.
- 18 Z. Sheng, H.-H. Kim, S. Yao and T. Nozaki, *Physical Chemistry Chemical Physics*, 2020, **22**, 19349–19358.
- 19 V. Lochař, *Appl Catal A Gen*, 2006, **309**, 33–36.

- 20 P. K. Huttunen, D. Labadini, S. S. Hafiz, S. Gokalp, E. P. Wolff, S. M. Martell and M. Foster, *Appl Surf Sci*, 2021, **554**, 149518.
- 21 Z. Lv, S. Zhu, S. Wang, M. Dong, Z. Qin, J. Wang and W. Fan, *Appl Catal A Gen*, 2023, **665**, 119378.
- 22 K. Lorber, J. Zavašnik, J. Sancho-Parramon, M. Bubaš, M. Mazaj and P. Djinović, *Appl Catal B*, 2022, **301**, 120745.
- 23 Z. Rao, K. Wang, Y. Cao, Y. Feng, Z. Huang, Y. Chen, S. Wei, L. Liu, Z. Gong, Y. Cui, L. Li, X. Tu, D. Ma and Y. Zhou, *J Am Chem Soc*, 2023, **145**, 24625–24635.
- 24 T. H. Tan, B. Xie, Y. H. Ng, S. F. B. Abdullah, H. Y. M. Tang, N. Bedford, R. A. Taylor, K.-F. Aguey-Zinsou, R. Amal and J. Scott, *Nat Catal*, 2020, **3**, 1034–1043.
- 25 X. Liu, *The Journal of Physical Chemistry C*, 2008, **112**, 5066–5073.
